# Supplementary material
Source: HighWire-hosted journal article supplement (https://www.cfp.ca/highwire/filestream/34668/field_highwire_adjunct_files/3/539_GHRYA_Resources_Page_4.pdf)
Supplement: 539_GHRYA_Resources_Page_4.pdf [file 539_GHRYA_Resources_Page_4.pdf]

Strength of Recommendations  
**Bold = Good**  
*Italics = Fair*  
 Plain Text = consensus or inconclusive evidence

|                     |                                              |
|---------------------|----------------------------------------------|
| HPV, Herpes simplex | <i>Not recommended for primary screening</i> |
|---------------------|----------------------------------------------|

Canadian Guidelines on STIs [www.phac-aspc.gc.ca/std-mts/sti-its/index-eng.php](http://www.phac-aspc.gc.ca/std-mts/sti-its/index-eng.php) USPSTF [www.uspreventiveservicestaskforce.org](http://www.uspreventiveservicestaskforce.org), SOGC [sogc.org](http://sogc.org)

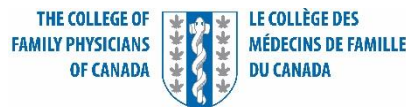

| Sexuality Questions  |                                                                                                                                                                                                   |
|----------------------|---------------------------------------------------------------------------------------------------------------------------------------------------------------------------------------------------|
| Partners             | Sex with men, women, both or people who identify in other ways?<br>How many partners in past 2 mos /12 mos?<br>Any partners having sex with someone else while in a sexual relationship with you? |
| Pregnancy Prevention | What are you doing to prevent pregnancy?                                                                                                                                                          |
| STI Protection       | What do you do to protect yourself from STIs / HIV?                                                                                                                                               |
| Practices            | Kind of sex: Vaginal, anal, oral.<br>Condom use – always, sometimes, never. If not always, what situations or circumstances make condom use less likely?                                          |
| Past STI history     | Have you or a partner -ever had a STI?<br>–exchanged sex for drugs or money?<br>Is there anything else about your sexual practices I need to know in order to help you?                           |

Adapted from: <http://www.cdc.gov/std/treatment/2010/clinical.htm#shpc>

### Cervical cancer, STI and Infectious Disease Screening

|                                                                                                                                                                                                                                                                                                                                                                                                                                 |                                                                                                                                                   |
|---------------------------------------------------------------------------------------------------------------------------------------------------------------------------------------------------------------------------------------------------------------------------------------------------------------------------------------------------------------------------------------------------------------------------------|---------------------------------------------------------------------------------------------------------------------------------------------------|
| <b>Pap smears for sexually active females beginning at age 21. Delay screening if not sexually active. Screen every three years. No HPV testing</b>                                                                                                                                                                                                                                                                             |                                                                                                                                                   |
| <i>Chlamydia and Gonorrhea</i>                                                                                                                                                                                                                                                                                                                                                                                                  |                                                                                                                                                   |
| Screen all asymptomatic sexually active women under 25 years males- assess risk                                                                                                                                                                                                                                                                                                                                                 | <i>Urine or vaginal* or cervical swabs (use first 10 to 20 ml of urine, Preferable to avoid voiding 2hrs prior but does not preclude testing)</i> |
| Screen those who are symptomatic or who have contact with an infected person                                                                                                                                                                                                                                                                                                                                                    | <i>Use vaginal* or cervical swabs for females<br/>Urine for males</i>                                                                             |
| * Vaginal self-administered swabs may be used. Instructions for sample collection should be given.                                                                                                                                                                                                                                                                                                                              |                                                                                                                                                   |
| Risk factors:<br><ul style="list-style-type: none"> <li>• Having a new sex partner, more than one sex partner, a partner with other concurrent partners, a partner with an STI</li> <li>• Inconsistent condom use in persons who are not mutually monogamous</li> <li>• Previous or existing STI</li> <li>• At risk population – eg those in prison, military recruits, attending an STI clinic, certain communities</li> </ul> |                                                                                                                                                   |

|                                                                                                                                                                                                                                                                                                                                                                                |                                               |
|--------------------------------------------------------------------------------------------------------------------------------------------------------------------------------------------------------------------------------------------------------------------------------------------------------------------------------------------------------------------------------|-----------------------------------------------|
| <b>HIV</b>                                                                                                                                                                                                                                                                                                                                                                     |                                               |
| Risk factors:<br><ul style="list-style-type: none"> <li>• Men who have sex with men</li> <li>• Injection drug users</li> <li>• Those with STI's or requesting STI testing</li> <li>• Unprotected vaginal or anal intercourse</li> <li>• Having sexual partners who are infected with HIV, bisexual, or injecting drugs</li> <li>• Exchanging sex for drugs or money</li> </ul> | <b>Screen all sexually active individuals</b> |

|                 |                                                                                                                                                                                                                                                                                                       |
|-----------------|-------------------------------------------------------------------------------------------------------------------------------------------------------------------------------------------------------------------------------------------------------------------------------------------------------|
| <b>Syphilis</b> | <b>Screen for those at increased risk, including high community prevalence</b>                                                                                                                                                                                                                        |
| Hep B           | <i>Screen high risk</i>                                                                                                                                                                                                                                                                               |
|                 | Risk factors:<br><ul style="list-style-type: none"> <li>• Men who have sex with men</li> <li>• Injection drug users</li> <li>• HIV positive people</li> <li>• Household or sexual contacts of people with Hep B infection</li> <li>• Those born in countries with high prevalence of Hep B</li> </ul> |
| Hep C           | <i>Screen high risk</i>                                                                                                                                                                                                                                                                               |
|                 | Risk factors:<br><ul style="list-style-type: none"> <li>• IV drug use intranasal drug use</li> <li>• Unregulated tattoos,</li> <li>• High risk sexual contacts and behaviours</li> <li>• Other percutaneous exposures</li> </ul>                                                                      |

| Prevention Counselling for Sexual Activity                                                         |              |
|----------------------------------------------------------------------------------------------------|--------------|
| Abstinence and reduction of number of sex partners                                                 | CDC          |
| <b>Pre-exposure Immunization – Hepatitis B, HPV</b>                                                | CDC, PHAC    |
| Pre-exposure Immunization for men who have sex with men – Hepatitis A                              | CDC, PHAC    |
| <b>Condom use (male), female condoms</b>                                                           | CDC, PHAC    |
| Education about STIs – signs, symptoms, transmission, risk factors, safer sex practices            | PHAC         |
| Nonoxynol 9 and increased risk of STI transmission                                                 | CDC, PHAC    |
| Partner testing (previously sexually active) for youth contemplating initiation of sexual activity | PHAC         |
| <b>Folic acid – peri-conceptual</b>                                                                | SOGC, USPSTF |
| Contraception                                                                                      | SOGC         |
| <i>Emergency contraception</i>                                                                     | SOGC, CDC    |

CDC <http://www.cdc.gov/std/tg2015/>  
 SOGC [sogc.org](http://sogc.org)  
 PHAC <http://www.phac-aspc.gc.ca/std-mts/sti-its/cgsti-lcits/index-eng.php>

|                                                                                                                                                              |
|--------------------------------------------------------------------------------------------------------------------------------------------------------------|
| <b>Iron deficiency</b>                                                                                                                                       |
| Counsel at risk populations: encourage consumption of adequate dietary iron. Measure ferritin in those with multiple risk factors or for clinical suspicion. |
| Risk factors:                                                                                                                                                |
| • Poor nutrition                                                                                                                                             |
| • Socio-economic factors                                                                                                                                     |
| • Adolescent                                                                                                                                                 |
| • Menstruating                                                                                                                                               |
| • Vegetarians                                                                                                                                                |
| • Regular blood donors                                                                                                                                       |
| • Certain ethnic groups – First Nations, Indo-Canadians                                                                                                      |
| Symptoms: tiredness, restlessness, attention-deficit/hyperactivity disorder (ADHD), irritability, growth retardation, cognitive and intellectual impairment. |
| <a href="http://www.bcguidelines.ca/guideline_iron_deficiency.html">www.bcguidelines.ca/guideline_iron_deficiency.html</a>                                   |

|                                                                                                                              |
|------------------------------------------------------------------------------------------------------------------------------|
| <b>Type II Diabetes Screening</b>                                                                                            |
| Screen individuals at higher risk as per consensus guidelines                                                                |
| Youth guidelines <a href="http://guidelines.diabetes.ca/Browse/Chapter35">http://guidelines.diabetes.ca/Browse/Chapter35</a> |
| Adult guidelines <a href="http://guidelines.diabetes.ca/Browse/Chapter4">http://guidelines.diabetes.ca/Browse/Chapter4</a>   |

**Copyright A. Greig 2018**  
**Disclaimer:** Given the evolving nature of evidence and changing recommendations, the Greig Health Record is meant to be used as a guide only. Preventive care is delivered both episodically and at dedicated visits. This tool may be used in part or as a whole.
